# Supplementary material for: The genetic architecture of DNA replication timing in human pluripotent stem cells
Source: PubMed Central journal article supplement (PMC8604924; doi:10.1038/s41467-021-27115-9), 2021-11-19
Supplement: 41467_2021_27115_MOESM2_ESM.pdf [file 41467_2021_27115_MOESM2_ESM.pdf]

## **Description of Additional Supplementary Files**

File Name: Supplementary Data 1

Description: List of rtQTLs Identified in This Study. The fastQTL package was used to calculate p-values for rtQTLs. The presented p-values were uncorrected for multiple testing. Correction for multiple testing was used when identifying significant associations (see Methods for details).

File Name: Supplementary Data 2

Description: Fine-mapped Genetic Variants of hESC rtQTLs by CAVIAR.

File Name: Supplementary Data 3

Description: Histone modifications associated with each hESC rtQTL.

File Name: Supplementary Data 4

Description: Locations of Histone modification Sites in hESCs.

File Name: Supplementary Data 5

Description: Locations of Replication Timing Peaks in hESCs.

File Name: Supplementary Data 6

Description: Locations of Histone modification Sites in iPSCs.

File Name: Supplementary Data 7

Description: Locations of Replication Timing Peaks in iPSCs.
